# Supplementary material for: Vortioxetine vs. Other Antidepressants in Patients with Major Depressive Episode With or Without Substance Use Disorder
Source: PubMed Central journal article supplement — Curr Neuropharmacol. 2021 Dec 13;19(12):2296–307. doi: 10.2174/1570159X19666210113150123 (PMC9185761; doi:10.2174/1570159x19666210113150123), 2021-12-13
Supplement: CN-19-2296_SD1.pdf [file CN-19-2296_SD1.pdf]

## Supplementary Material

### Vortioxetine vs. Other Antidepressants in Patients with Major Depressive Episode with or Without Substance Use Disorder

Georgios D. Kotzalidis<sup>1,2,\*</sup>, Ginevra Lombardozi<sup>1,3</sup>, Marta Matrone<sup>1,4</sup>, Emanuela Amici<sup>1</sup>, Filippo Perrini<sup>1,5</sup>, Ilaria Cuomo<sup>6</sup> and Sergio De Filippis<sup>1</sup>

<sup>1</sup>Clinica Villa von Siebenthal Neuropsychiatric Hospital, Genzano di Rona, Via della Madonnina 1, 00045 Genzano di Roma RM, Italy; <sup>2</sup>NESMOS Department, Faculty of Medicine and Psychology, Sapienza University of Rome, Via di Grottarossa 1035-1039, 00189 Roma RM, Italy; <sup>3</sup>U.O.C. Psichiatria e Psicologia Clinica, Dipartimento Benessere della Salute Mentale e Neurologica, Dentale e degli Organi Sensoriali, Tor Vergata University, Rome, Italy; <sup>4</sup>Department of Neuroscience and Reproductive and Odontostomatologic Sciences, Federico II University, Naples, Italy; <sup>5</sup>Istituto A.T. Beck-Diagnostic Centre, Research and Training in Cognitive-Behavioral Psychotherapy, Rome, Italy; <sup>6</sup>UOC I Distretto ASL Roma 1, C.C. Regina Coeli, Rome, Italy

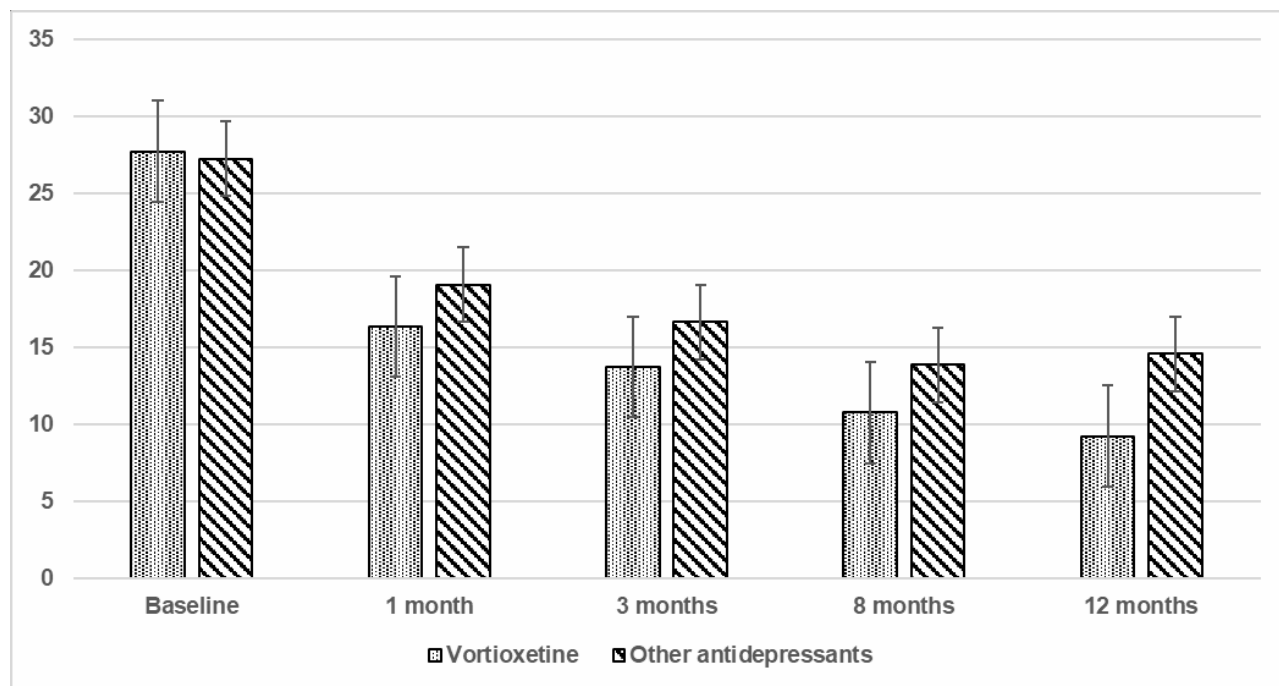

**Suppl. Fig. 1.** Time course of MADRS scores in the two treatment groups. In no timepoint did the two treatments differ from one another significantly.

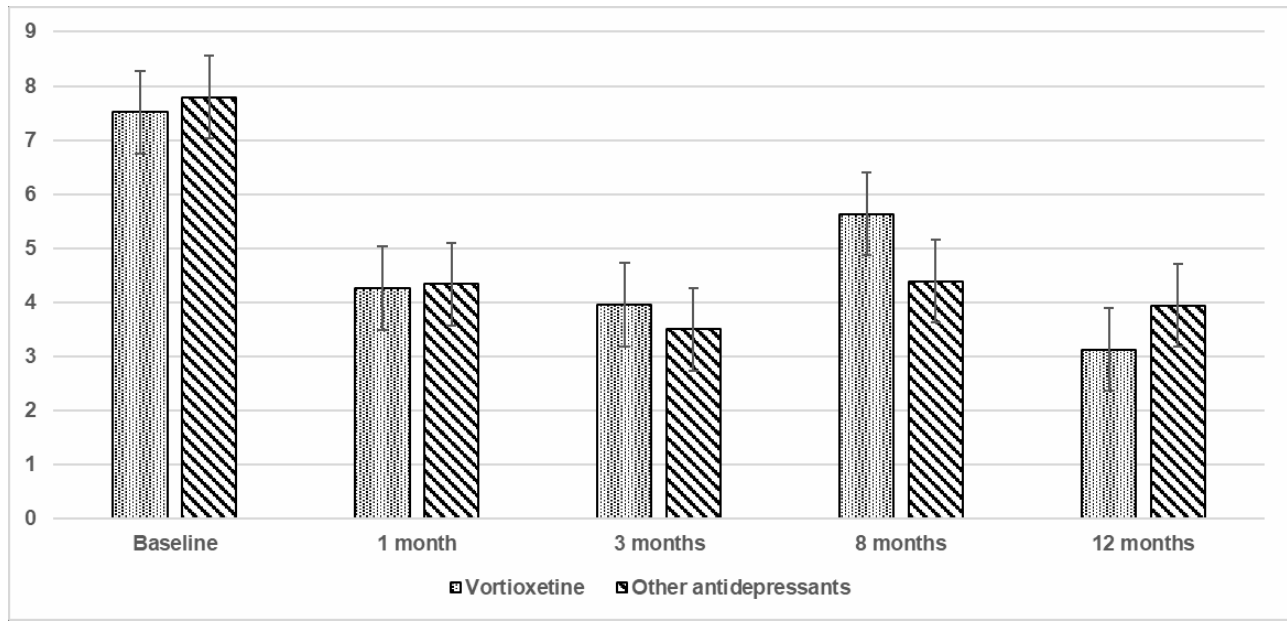

**Suppl. Fig. 2.** Time course of YMRS scores in the two treatment groups; between-groups differences were not significant at all timepoints.

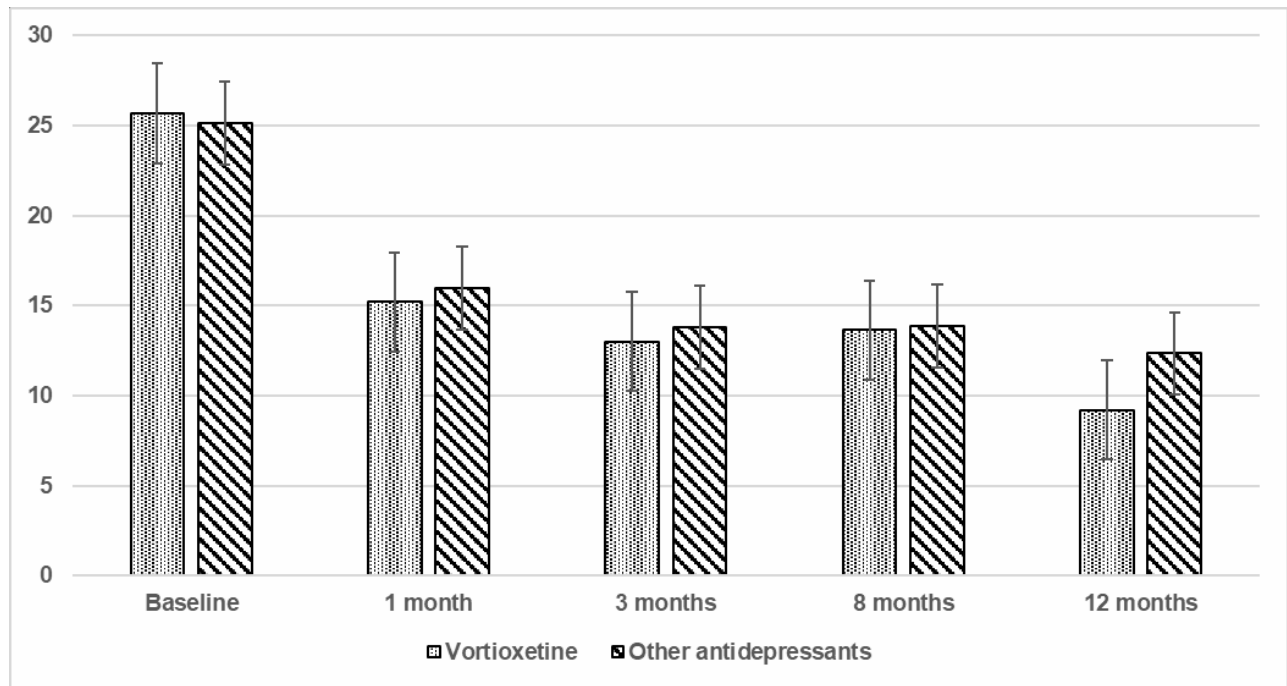

**Suppl. Fig. 3.** Time course of HAM-A scores in the two treatment groups; between-groups differences were not significant at all timepoints.

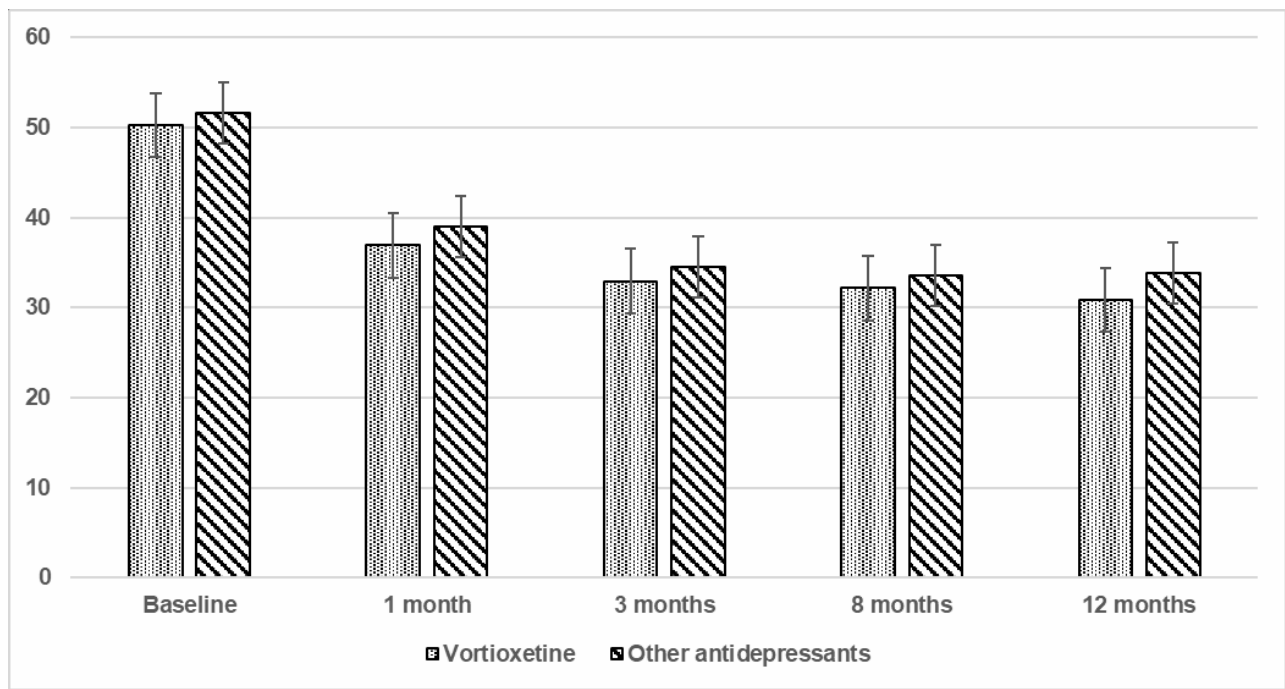

**Suppl. Fig. 4.** Time course of BPRS scores in the two treatment groups; between-groups differences were not significant.

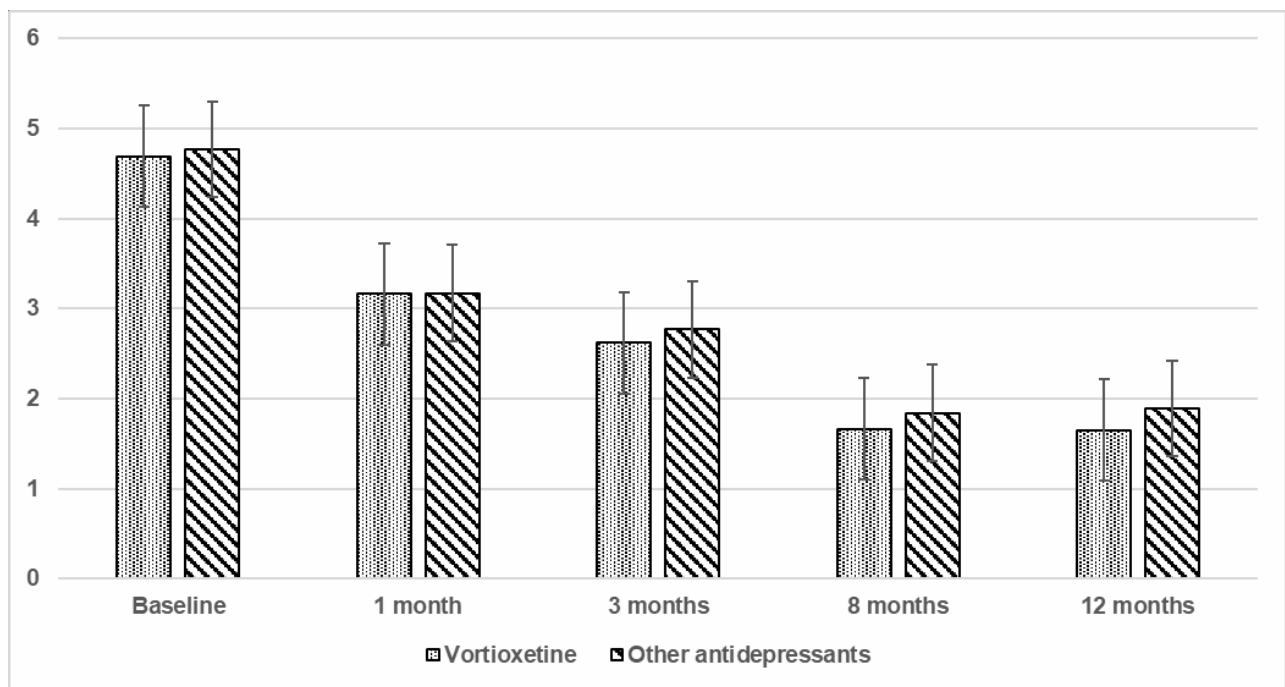

**Suppl. Fig. 5.** Time course of CGI-S scores in the two treatment groups; the two groups showed a significant reduction in severity, without differing significantly from one another.

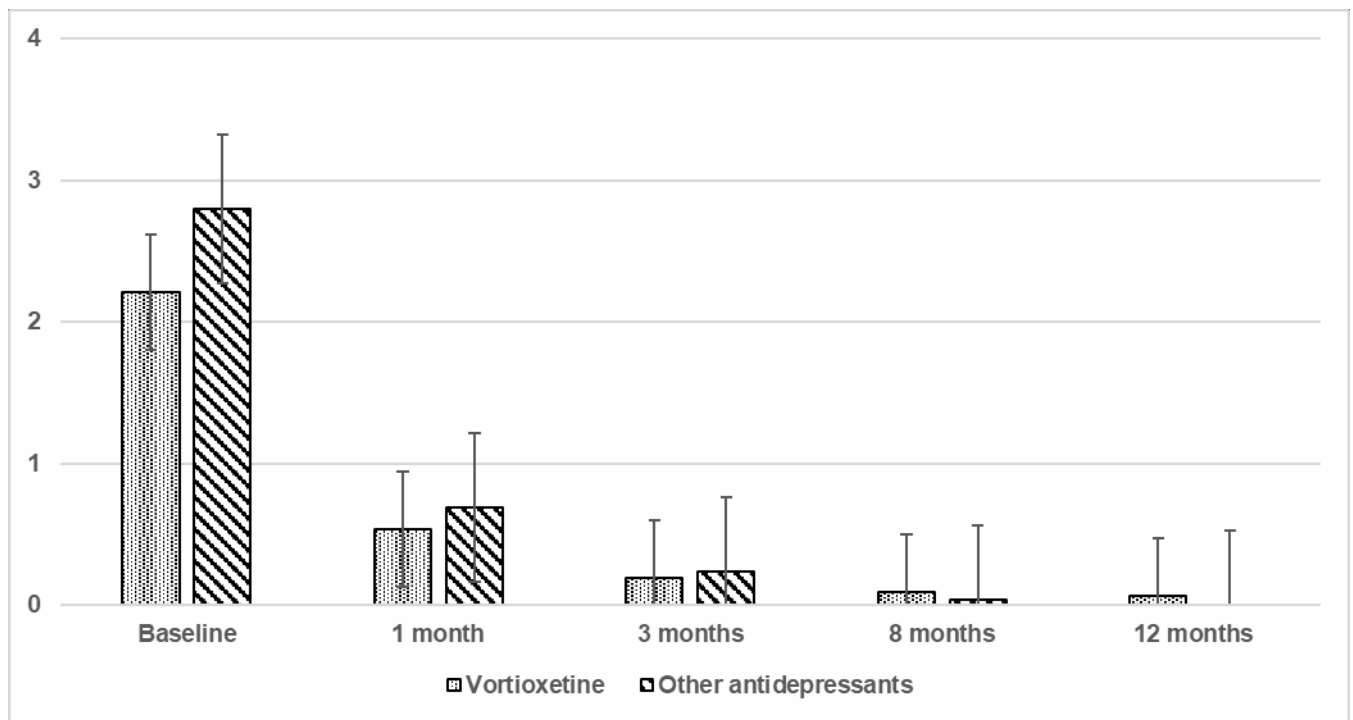

**Suppl. Fig. 6.** Time course of C-SSRS scores in the two treatment groups; the two groups showed a significant reduction in suicidal scores, but did not differ significantly from one another.

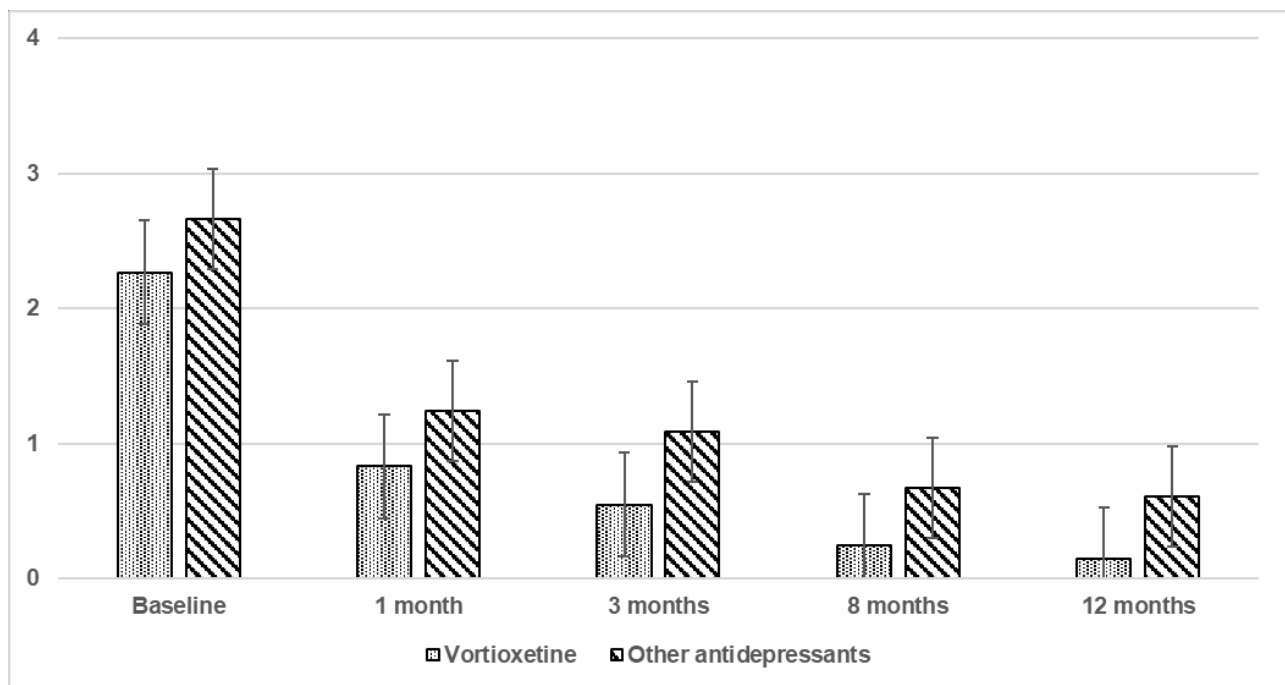

**Suppl. Fig. 7.** Time course of VAScrav scores in the two treatment groups. With vortioxetine, scores dropped more steeply than with other antidepressants from 1 to 12 months, although the two treatments did not differ significantly.

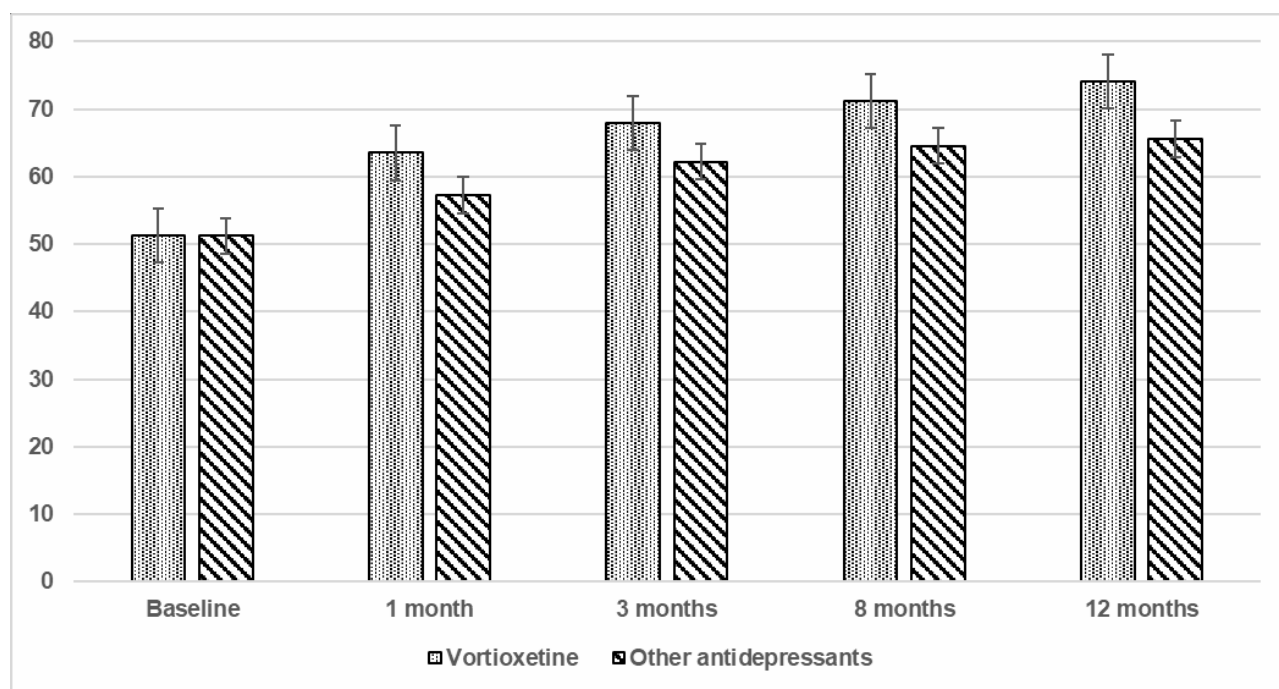

**Suppl. Fig. 8.** Time course of WHOQOL scores in the two treatment groups. The two treatments did not differ on their scores on quality-of-life.

**Supplementary Table 1.** Response/remission rates according to the CGI-S 1 or 2/1 and MADRS  $\geq 60\%$  drop from BL and final MADRS score  $\leq 10$ /MADRS  $< 7$  criteria per treatment group and SUD comorbidity.

| Treatment group (N)                 | Criterion | Responders, N (%) | Remitters, N (%) |
|-------------------------------------|-----------|-------------------|------------------|
| Vortioxetine (N=126)                | CGI-S     | 99 (78.57%)       | 77 (61.11%)      |
|                                     | MADRS     | 87 (69.05%)       | 67 (53.17%)      |
|                                     | Both      | 70 (55.56%)       | 59 (46.82%)      |
| NonSUD (N=84)                       | CGI-S     | 64 (76.19%)       | 48 (57.14%)      |
|                                     | MADRS     | 56 (66.67%)       | 42 (50%)         |
|                                     | Both      | 53 (63.10%)       | 37 (44.04%)      |
| SUD (N=42)                          | CGI-S     | 35 (83.33%)       | 29 (69.04%)      |
|                                     | MADRS     | 31 (73.81%)       | 25 (59.52%)      |
|                                     | Both      | 30 (71.43%)       | 22 (52.38%)      |
| Other antidepressants (ADs) (N=100) | CGI-S     | 75 (75%)          | 51 (51%)         |
|                                     | MADRS     | 36 (36%)          | 15 (15%)         |
|                                     | Both      | 36 (36%)          | 12 (12%)         |
| NonSUD (N=62)                       | CGI-S     | 44 (70.97%)       | 31 (50%)         |
|                                     | MADRS     | 23 (37.10%)       | 12 (19.35%)      |
|                                     | Both      | 33 (53.23%)       | 16 (25.81%)      |
| SUD (N=38)                          | CGI-S     | 31 (81.58%)       | 20 (52.63%)      |
|                                     | MADRS     | 13 (34.21%)       | 3 (7.89%)        |
|                                     | Both      | 13 (34.21%)       | 2 (5.26%)        |

*Abbreviations:* BL, baseline; CGI-S, Clinical Global Impressions-Severity; MADRS, Montgomery-Åsberg Depression Rating Scale; SUD, substance use disorder.

**Supplementary Table 2.** Effect size (expressed as Cohen's *d*) based on CGI-S score variations between baseline and end-point according to treatment group and SUD comorbidity.

| Treatment group               | Co-  | Cohen's clas- |  | Sawilowsky's |
|-------------------------------|------|---------------|--|--------------|
| Vortioxetine ( <i>N</i> =126) | 4.64 | L             |  | H            |
| NonSUD ( <i>N</i> =84)        | 3.51 | L             |  | H            |
| SUD ( <i>N</i> =42)           | 4.23 | L             |  | H            |
| Other ADs ( <i>N</i> =100)    | 3.09 | L             |  | H            |
| NonSUD ( <i>N</i> =62)        | 3.00 | L             |  | H            |
| SUD ( <i>N</i> =38)           | 3.25 | L             |  | H            |
| NonSUD, both groups           | 3.00 | L             |  | H            |
| SUD, both groups              | 3.70 | L             |  | H            |

*Abbreviations:* ADs, antidepressants; CGI-S, Clinical Global Impressions-Severity; SUD, substance use disorder.
